# Supplementary material
Source: PubMed Central journal article supplement (PMC3387531)
Supplement: NIHMS369845-supplement-Fig_2.pdf [file NIHMS369845-supplement-Fig_2.pdf]

| CHR | GENE                                                                                                                                                                                                                                  |
|-----|---------------------------------------------------------------------------------------------------------------------------------------------------------------------------------------------------------------------------------------|
| 1   | CYP4B1, CYP4Z1, SLC16A1                                                                                                                                                                                                               |
| 2   | ABCB11, CYP1B1, CYP20A1, GNLY, SLC5A6, SULT1C2, SULT1C3, SULT1C4                                                                                                                                                                      |
| 3   | ABCC5, CYP8B1, SLC15A2, SLC02A1                                                                                                                                                                                                       |
| 4   | ABCG2, SULT1B1, SULT1E1                                                                                                                                                                                                               |
| 5   | SLC22A4, SLC22A5, SLC05C1                                                                                                                                                                                                             |
| 6   | ABCC10, ABCF1, CYP39A1, HLA-A, HLA-B, HLA-C, HLA-DMA, HLA-DMB, HLA-DOA, HLA-DOA, HLA-DPA1, HLA-DQB1, HLA-DQB2, HLA-DRA, HLA-DRB1, HLA-DRB5, HLA-E, HLA-F, HLA-G, HLA-H, SLC22A1, SLC22A2, SLC22A3, SLC22A7, SLC29A1, SLC39A7, SLC44A4 |
| 7   | ABCB1, ABCB4, CYP3A4, CYP3A43, CYP3A5, CYPEA7, CYP51A1, SLC13A1, SLC29A4                                                                                                                                                              |
| 8   | CYP11B1, CYP11B2, CYP7A1, SLC05A1, SULF1                                                                                                                                                                                              |
| 9   | SLC28A3                                                                                                                                                                                                                               |
| 10  | ABCC2, CYP17A1, CYP2C18, CYP2C19, CYP2C8, CYP2C9, CYP2E1, SLC29A3, SLC29A3                                                                                                                                                            |
| 11  | ABCC8, SLC22A6, SLC22A8, SLC22A9, SLC29A2, SLC02B1                                                                                                                                                                                    |
| 12  | CYP27B1, IFNG, SLC01A2, SLC01B1, SLC01B3, SLC01C1                                                                                                                                                                                     |
| 12  | IFNG, SLC01A2, SLC01B1, SLC01B3,                                                                                                                                                                                                      |
| 13  | SLCO1C1                                                                                                                                                                                                                               |
| 14  | ABCC4, SLC10A2, SLC15A1                                                                                                                                                                                                               |
| 15  | SLC10A1, SLC7A7                                                                                                                                                                                                                       |
| 16  | CYP11A1, CYP19A1, CYP1A1, CYP1A2, SLC28A1, SLC28A2, SLC03A1                                                                                                                                                                           |
| 16  | ABCC1, ABCC12, ABCC6, SLC7A5, SULT1A1, SULT1A2                                                                                                                                                                                        |
| 17  | ABCC3                                                                                                                                                                                                                                 |
| 19  | CYP2A13, CYP2A6, CYP2A7, CYP2B6, CYP2F1, CYP2S1, CYP4F11, CYP4F12, CYP4F2, CYP4F3, CYP4F8, ICAM1, ICAM5, SULT2A1, SULT2B1                                                                                                             |
| 20  | CYP24A1, SLC04A1                                                                                                                                                                                                                      |
| 21  | SLC19A1                                                                                                                                                                                                                               |
| 22  | CYP2D6, CYP2D7P1, SULT4A1                                                                                                                                                                                                             |
| X   | ABCB7                                                                                                                                                                                                                                 |
